# Supplementary material
Source: Research Square preprint supplement (doi:10.21203/rs.3.rs-8844897/v1)
Supplement: Supplementary file 1 [file 070984d59c5f5925d1b62d5e.pdf]

# Supplementary Material 1

## 1. Ocular Motor Task Design:

All eye-movement assessments were performed using a custom iOS application recording via the iPhone TrueDepth infrared camera (60 Hz). Five canonical paradigms were administered:

### 1.1 Visually guided saccades

Two black “X” targets positioned 12.5 cm apart ( $\approx 20^\circ$  visual angle at a viewing distance of  $\sim 35$  cm) alternated every 2 seconds.

- **Vertical saccades:** participants followed the up–down alternation.
- **Horizontal saccades:** the phone was rotated  $90^\circ$  counterclockwise; the same task was repeated along the horizontal axis.

The application incorporated a leveling indicator to ensure consistent angular alignment.

### 1.2 Self-paced saccades (SPS)

Participants voluntarily alternated their gaze between the two fixed targets for 20 seconds.

**Output:** total number of saccades generated

### 1.3 Smooth pursuit (slow eye-tracking)

A black dot moved sinusoidally at  $7^\circ/s$  across the central visual field.

- Participants were instructed to “follow the black dot as smoothly as possible with your eyes.”
- The predictable sinusoidal pattern enabled template-based trajectory comparison.

### 1.4 Anti-saccades

A peripheral stimulus appeared abruptly at predefined positions.

- Participants were instructed to look in the **opposite direction**.
- **Anti-saccade errors** = percentage of initial saccades made **towards** the stimulus.

Trajectory plots were used to confirm error labeling.

### 1.5 Fixation with distractors

Participants fixated a central “X” while peripheral images appeared briefly and unpredictably.

- Deviations  $> 2^\circ$  from central fixation were scored as fixation losses, reflecting impaired inhibitory control.

### 1.6 Blink and head-thrust detection

Blink and head-thrust events were automatically flagged:

- **Blink:** 0 = absent, 1 = present (within window preceding saccade)
- **Head-thrust:** 0 = absent, 1 = present

These variables were used to mark data potentially impacted by artifacts.

## 2. Signal Processing Pipeline

Raw gaze-position traces were exported in *CSV* format and processed offline using a standardized pipeline:

1. **Blink removal and interpolation**
2. **Median filtering (3–9 samples)** to remove high-frequency noise
3. **Baseline correction** (detrending with 0.1 Hz high-pass)
4. **Velocity computation** via numerical derivative

Trajectories were kept in degrees of visual angle to preserve physiological interpretability.

## 3. Feature Extraction

The metrics provided to the LLMs belonged to **two distinct categories**:

### 3.1 Trajectory-based metrics (template matching)

Trajectory-based features were extracted for:

- **Vertical saccades**
- **Horizontal saccades**
- **Vertical smooth pursuit**
- **Horizontal smooth pursuit**

These tasks follow well-defined physiological patterns and therefore allow quantitative similarity assessment.

### 3.1.1 Physiological templates

- **Saccades:** modeled with a pulse–step function approximating canonical saccadic kinematics (fast ballistic rise + stable fixation).
- **Pursuit:** modeled using a sinusoidal trajectory

$$T(t)=A\cdot\sin(2\pi ft+\phi)$$

Templates were scaled to each task’s amplitude and sampling frequency.

### 3.1.2 Best-fit similarity algorithm

Each recorded trace **S(t)** was:

- amplitude-normalized,
- partially time-warped,
- aligned to the template **T(t)**.

#### Interpretation:

- **High AUC** → near-normal physiology
- **Low AUC** → greater deviation

Outputs:

- Vertical Saccades
- Horizontal Saccades
- Average Saccades
- Vertical Pursuit
- Horizontal Pursuit
- Average Pursuit
- 

### 3.2 Event-based metrics

Tasks involving discrete events were quantified directly:

| <b>Metric</b>                  | <b>Meaning</b>                             |
|--------------------------------|--------------------------------------------|
| <b>AS Error Rate (%)</b>       | % incorrect initial saccades toward target |
| <b>SPS count</b>               | Number of voluntary saccades in 20 s       |
| <b>Fixation deviations (%)</b> | % epochs with drift > 2°                   |

These features capture inhibitory control, executive function, and gaze stability, deficits well described in Huntington’s disease.

# Supplementary Material 2

## 1. Construction of LLM Input Vector

For each participant, the following values were concatenated in a structured numerical summary:

- **Vertical Saccades AUC**
- **Horizontal Saccades AUC**
- **Average Saccades AUC**
- **Vertical Pursuit AUC**
- **Horizontal Pursuit AUC**
- **Average Pursuit AUC**
- **AS Error Rate (%)**
- **SPS Count**
- **Fixation Deviations (%)**

No clinical data (UHDRS, TFC, MoCA) or diagnostic hints were included.

## 2. LLM Prompt Structure and Zero-Shot Inference

Each participant's metrics were fed **independently** to four LLMs:

- GPT-5.1
- DeepSeek R1
- Gemini
- Claude

### 2.1 Prompt Design

The prompt required the model to:

1. Interpret the physiological values.
2. Estimate a **probability of Huntington's disease (0–100%)**.
3. Assign one categorical label:
  - "Likely HD"
  - "Uncertain"
  - "Likely Control"
4. Output results in JSON-like format.
5. Base inference **solely** on the numerical ocular motor metrics.
6. The exact prompt used for all models is included in the manuscript above:

## **PROMPT**

*“You are an AI research assistant helping in a study about Huntington’s Disease (HD). Your task is to estimate the probability that a given case belongs to the HD group vs the control group, based ONLY on eye movement measurements. Higher values indicate greater oculomotor impairment and are more frequently found in HD.*

*Metrics provided:*

- Vertical Saccades*
- Horizontal Saccades*
- Average Saccades*
- Vertical Pursuit*
- Horizontal Pursuit*
- Average Pursuit*
- Antisaccade Error Rate*
- Self-paced Saccades*
- Fixation Deviations (>2 degrees)*
- Blink or head-thrust before saccade (yes/no)*

## **YOUR TASK:**

*Estimate:*

*Probability of HD (0–100%)*

*Classification: “Likely HD”, “Uncertain”, or “Likely Control”*

*Base your reasoning only on these values.*

*Output strictly in this JSON-like format: { "HD\_probability\_percent": <number>, "classification": <string>, "reasoning": <short text> }*

## 2.2 Preventing diagnostic leakage

To ensure that disease detection was based purely on physiology:

- No labels/examples were provided.
- No clinical descriptions or keywords (“chorea”, “Huntington”, etc.) appeared in the input.
- Each participant was processed in isolation.
- Prompts were restricted to numerical values.

This guarantees **zero-shot** inference.

## Supplementary Table 1

| Ocular motor domain | Clinical score 0 | Clinical score 1 | Clinical score 2 | Clinical score 3 | Clinical score 4 |
|---------------------|------------------|------------------|------------------|------------------|------------------|
| Vertical saccades   | 0.86 [0.81–0.88] | 1.31 [1.16–1.38] | 1.57 [1.51–1.64] | 2.22 [2.07–2.48] | 4.13 [4.09–4.23] |
| Horizontal saccades | 1.30 [1.01–1.82] | 1.54 [1.26–1.66] | 1.77 [1.70–1.88] | 2.76 [2.39–3.08] | 4.14 [4.12–4.94] |
| Vertical pursuit    | 0.67 [0.64–0.77] | 1.10 [1.00–1.19] | 1.28 [1.24–1.30] | 1.87 [1.61–1.93] | 2.68 [2.31–3.24] |
| Horizontal pursuit  | 0.64 [0.20–0.92] | 1.26 [1.15–1.32] | 1.50 [1.49–1.62] | 1.79 [0]         | 3.19 [2.92–3.35] |

### Supplementary Table 1. Median [IQR] smartphone-derived ocular motor metrics across neurologist-rated clinical severity scores

**Legend:** Values are reported as median [interquartile range]. Higher values indicate worse ocular motor performance.

## Supplementary Table 2

| Patient | Diagnosis | GPT_class      | GPT_prob % | DeepSeek_class | DeepSeek_prob % | Gemini_class   | Gemini_prob % | Claude_class   | Claude_prob % |
|---------|-----------|----------------|------------|----------------|-----------------|----------------|---------------|----------------|---------------|
| 1       | HD        | Likely HD      | 96         | Likely HD      | 95              | Likely HD      | 90            | Likely HD      | 85            |
| 2       | HC        | Likely Control | 4          | Likely Control | 5               | Likely Control | 2             | Likely Control | 5             |
| 3       | HD        | Likely HD      | 82         | Likely HD      | 85              | Likely HD      | 75            | Likely HD      | 70            |
| 4       | HD        | Likely HD      | 88         | Likely HD      | 80              | Likely HD      | 80            | Likely HD      | 65            |
| 5       | HD        | Uncertain      | 62         | Uncertain      | 65              | Uncertain      | 55            | Uncertain      | 45            |
| 6       | HC        | Likely Control | 18         | Likely Control | 10              | Likely Control | 1             | Likely Control | 15            |
| 7       | HC        | Likely Control | 10         | Likely Control | 5               | Likely Control | 1             | Likely Control | 10            |
| 8       | HC        | Likely Control | 20         | Likely Control | 20              | Likely Control | 3             | Likely Control | 12            |
| 9       | HD        | Likely HD      | 85         | Likely HD      | 90              | Likely HD      | 85            | Likely HD      | 75            |
| 10      | HD        | Uncertain      | 48         | Uncertain      | 60              | Uncertain      | 60            | Uncertain      | 40            |
| 11      | HD        | Likely Control | 22         | Uncertain      | 30              | Uncertain      | 30            | Likely Control | 8             |
| 12      | HD        | Likely Control | 28         | Uncertain      | 40              | Uncertain      | 45            | Likely Control | 25            |
| 13      | HC        | Likely Control | 12         | Likely Control | 5               | Likely Control | 1             | Likely Control | 5             |
| 14      | HD        | Likely Control | 24         | Uncertain      | 25              | Uncertain      | 20            | Likely Control | 8             |
| 15      | HD        | Likely HD      | 92         | Likely HD      | 98              | Likely HD      | 95            | Likely HD      | 90            |
| 16      | HC        | Likely Control | 18         | Uncertain      | 25              | Uncertain      | 15            | Likely Control | 10            |
| 17      | HD        | Likely HD      | 97         | Likely HD      | 99              | Likely HD      | 99            | Likely HD      | 95            |
| 18      | HD        | Likely Control | 18         | Likely Control | 5               | Likely Control | 2             | Likely Control | 15            |
| 19      | HD        | Uncertain      | 42         | Uncertain      | 70              | Uncertain      | 65            | Uncertain      | 35            |
| 20      | HC        | Likely Control | 12         | Likely Control | 2               | Likely Control | 1             | Likely Control | 10            |
| 21      | HC        | Likely Control | 8          | Likely Control | 1               | Likely Control | 1             | Likely Control | 5             |

|    |    |                |    |                |    |                |    |                |    |
|----|----|----------------|----|----------------|----|----------------|----|----------------|----|
| 22 | HC | Uncertain      | 28 | Uncertain      | 60 | Uncertain      | 10 | Likely Control | 8  |
| 23 | HC | Likely Control | 20 | Uncertain      | 55 | Uncertain      | 5  | Likely Control | 5  |
| 24 | HC | Likely Control | 15 | Uncertain      | 25 | Uncertain      | 35 | Likely Control | 12 |
| 25 | HC | Likely Control | 22 | Likely Control | 15 | Likely Control | 3  | Likely Control | 18 |
| 26 | HC | Likely Control | 26 | Uncertain      | 60 | Uncertain      | 15 | Likely Control | 20 |

**Supplementary Table 2: AI-derived probability classifications for HD vs. control across four large language models. Legend** This table reports the categorical classifications (“Likely HD”, “Uncertain”, “Likely Control”) and continuous probability estimates (0–100%) generated by four independent large language models (GPT-5.1, DeepSeek R1, Gemini, and Claude) for all participants in the study (HD = Huntington’s disease; HC = healthy controls). Models were prompted in zero-shot mode using only smartphone-derived oculomotor metrics without access to clinical or diagnostic information. Higher probability values indicate greater oculomotor impairment consistent with HD physiology. Class labels reflect model-specific decision rules defined in the structured prompt. **Abbreviations:** HD = Huntington’s disease; HC = healthy control.
